# Supplementary material for: Training high-performance deep learning classifier for diagnosis in oral cytology using diverse annotations
Source: Research Square preprint supplement (doi:10.21203/rs.3.rs-4207168/v1), 2024-04-18
Supplement: Supplementary file 1 [file 625fc0c10844cfc30b676f6a.docx]

Training high-performance deep learning classifier for diagnosis in oral cytology using diverse annotations

**Appendix.S1**

***Performance metrics***

We evaluated the performance metrics, with accuracy, precision, recall, and the F1 score as defined in Equations (1)– (4), along with the receiver operating characteristic curve (ROC), and the area under the ROC curve (AUC). The ROC curves were shown for the complete dataset from the 4-fold cross-validation, producing the median AUC value.

In the following equations, TP, TN, FP, and FN represent true positive (normal correctly identified), true negative (abnormal correctly identified), false positive (abnormal incorrectly identified), and false negative (normal incorrectly identified) results, respectively.

(1)

(2)

(3)

(4)

**Appendix.S2**

***Comparison of performance of each model***

| AUC |  | Pathologist A model | Pathologist B model | Pathologist C model | GT model | Majority model | Probabilistic model |
| --- | --- | --- | --- | --- | --- | --- | --- |
| Case2 | Ave (SD) | 0.799 (0.016) | 0.735 (0.021) | 0.828 (0.007) | 0.769 (0.015) | 0.760 (0.033) | 0.802 (0.017) |
|  | 95%CI | 0.789-0.809 | 0.722-0.748 | 0.823-0.832 | 0.760-0.778 | 0.739-0.780 | 0.791-0.812 |
| Case3 | Ave (SD) | 0.736 (0.017) | 0.84 (0.034) | 0.803 (0.029) | 0.858 (0.014) | 0.803 (0.025) | 0.861 (0.013) |
|  | 95%CI | 0.726-0.747 | 0.819-0.862 | 0.785-0.821 | 0.849-0.866 | 0.788-0.818 | 0.853-0.870 |
| Case4 | Ave (SD) | 0.785 (0.035) | 0.822 (0.015) | 0.859 (0.01) | 0.882 (0.015) | 0.88 (0.012) | 0.802 (0.02) |
|  | 95%CI | 0.763-0.806 | 0.812-0.831 | 0.853-0.865 | 0.873-0.892 | 0.873-0.888 | 0.789-0.815 |
| Case5 | Ave (SD) | 0.954 (0.058) | 0.979 (0.013) | 0.972 (0.025) | 0.307 (0.134) | 0.799 (0.119) | 0.995 (0.006) |
|  | 95%CI | 0.918-0.989 | 0.971-0.987 | 0.957-0.988 | 0.224-0.390 | 0.725-0.872 | 0.991-0.999 |
| Case6 | Ave (SD) | 0.962 (0.014) | 0.911 (0.033) | 0.945 (0.038) | 0.882 (0.04) | 0.904 (0.042) | 0.991 (0.004) |
|  | 95%CI | 0.954-0.971 | 0.890-0.931 | 0.922-0.969 | 0.857-0.907 | 0.878-0.930 | 0.989-0.994 |
|  |  |  |  |  |  |  |  |
| Accuracy |  | Pathologist A model | Pathologist B model | Pathologist C model | GT model | Majority model | Probabilistic model |
| Case2 | Ave (SD) | 0.739 (0.014) | 0.699 (0.013) | 0.759 (0.009) | 0.712 (0.011) | 0.708 (0.029) | 0.728 (0.017) |
|  | 95%CI | 0.730-0.747 | 0.692-0.707 | 0.753-0.764 | 0.706-0.719 | 0.690-0.725 | 0.718-0.738 |
| Case3 | Ave (SD) | 0.716 (0.102) | 0.701 (0.119) | 0.749 (0.113) | 0.779 (0.105) | 0.835 (0.067) | 0.763 (0.121) |
|  | 95%CI | 0.652-0.779 | 0.627-0.774 | 0.679-0.819 | 0.714-0.844 | 0.794-0.877 | 0.689-0.837 |
| Case4 | Ave (SD) | 0.74 (0.069) | 0.776 (0.049) | 0.740 (0.100) | 0.76 (0.043) | 0.812 (0.046) | 0.771 (0.072) |
|  | 95%CI | 0.697-0.783 | 0.745-0.806 | 0.678-0.802 | 0.734-0.787 | 0.782-0.840 | 0.727-0.816 |
| Case5 | Ave (SD) | 0.94 (0.062) | 0.956 (0.025) | 0.945 (0.048) | 0.273 (0.127) | 0.687 (0.178) | 0.988 (0.012) |
|  | 95%CI | 0.902-0.979 | 0.941-0.972 | 0.915-0.975 | 0.195-0.352 | 0.576-0.797 | 0.981-0.996 |
| Case6 | Ave (SD) | 0.948 (0.032) | 0.853 (0.031) | 0.882 (0.064) | 0.803 (0.072) | 0.806 (0.115) | 0.967 (0.019) |
|  | 95%CI | 0.929-0.968 | 0.834-0.872 | 0.843-0.922 | 0.759-0.848 | 0.734-0.877 | 0.955-0.979 |
|  |  |  |  |  |  |  |  |
| Precision |  | Pathologist A model | Pathologist B model | Pathologist C model | GT model | Majority model | Probabilistic model |
| Case2 | Ave (SD) | 0.741 (0.026) | 0.769 (0.026) | 0.772 (0.031) | 0.715 (0.031) | 0.728 (0.028) | 0.737 (0.052) |
|  | 95%CI | 0.724-0.757 | 0.753-0.785 | 0.752-0.791 | 0.692-0.738 | 0.710-0.745 | 0.705-0.769 |
| Case3 | Ave (SD) | 0.028 (0.007) | 0.036 (0.012) | 0.037 (0.012) | 0.046 (0.016) | 0.049 (0.015) | 0.045 (0.02) |
|  | 95%CI | 0.024-0.033 | 0.028-0.043 | 0.028-0.047 | 0.036-0.056 | 0.040-0.058 | 0.033-0.058 |
| Case4 | Ave (SD) | 0.307 (0.064) | 0.347 (0.047) | 0.350 (0.128) | 0.340 (0.037) | 0.397 (0.068) | 0.348 (0.095) |
|  | 95%CI | 0.267-0.347 | 0.318-0.376 | 0.270-0.429 | 0.317-0.363 | 0.355-0.440 | 0.289-0.407 |
| Case5 | Ave (SD) | 0.999 (0.002) | 0.998 (0.001) | 0.997 (0.001) | 0.993 (0.007) | 0.996 (0.002) | 0.998 (0.001) |
|  | 95%CI | 0.998-1.000 | 0.997-0.999 | 0.997-0.998 | 0.989-0.997 | 0.995-0.998 | 0.997-0.999 |
| Case6 | Ave (SD) | 0.401 (0.157) | 0.159 (0.032) | 0.219 (0.083) | 0.125 (0.035) | 0.155 (0.086) | 0.500 (0.126) |
|  | 95%CI | 0.303-0.498 | 0.139-0.178 | 0.167-0.270 | 0.104-0.147 | 0.102-0.209 | 0.422-0.578 |
|  |  |  |  |  |  |  |  |
| Recall |  | Pathologist A model | Pathologist B model | Pathologist C model | GT model | Majority model | Probabilistic model |
| Case2 | Ave (SD) | 0.748 (0.045) | 0.585 (0.055) | 0.749 (0.055) | 0.731 (0.084) | 0.678 (0.06) | 0.739 (0.096) |
|  | 95%CI | 0.720-0.776 | 0.551-0.619 | 0.717-0.781 | 0.679-0.782 | 0.641-0.715 | 0.679-0.799 |
| Case3 | Ave (SD) | 0.715 (0.121) | 0.915 (0.092) | 0.769 (0.081) | 0.846 (0.109) | 0.708 (0.061) | 0.846 (0.136) |
|  | 95%CI | 0.641-0.790 | 0.858-0.972 | 0.719-0.819 | 0.779-0.914 | 0.670-0.745 | 0.763-0.930 |
| Case4 | Ave (SD) | 0.739 (0.112) | 0.817 (0.064) | 0.839 (0.145) | 0.904 (0.079) | 0.809 (0.069) | 0.730 (0.102) |
|  | 95%CI | 0.670-0.809 | 0.778-0.857 | 0.749-0.929 | 0.855-0.953 | 0.766-0.851 | 0.667-0.794 |
| Case5 | Ave (SD) | 0.941 (0.062) | 0.958 (0.025) | 0.947 (0.048) | 0.271 (0.128) | 0.687 (0.178) | 0.990 (0.0129 |
|  | 95%CI | 0.902-0.980 | 0.943-0.973 | 0.917-0.977 | 0.192-0.350 | 0.577-0.798 | 0.983-0.997 |
| Case6 | Ave (SD) | 0.900 (0.052) | 0.927 (0.072) | 0.936 (0.061) | 0.891 (0.094) | 0.900 (0.145) | 0.991 (0.029) |
|  | 95%CI | 0.868-0.932 | 0.883-0.972 | 0.898-0.974 | 0.832-0.949 | 0.810-0.990 | 0.973-1.000 |
|  |  |  |  |  |  |  |  |
| F1 score |  | Pathologist A model | Pathologist B model | Pathologist C model | GT model | Majority model | Probabilistic model |
| Case2 | Ave (SD) | 0.743 (0.017) | 0.662 (0.03) | 0.758 (0.014) | 0.718 (0.026) | 0.700 (0.037) | 0.731 (0.03) |
|  | 95%CI | 0.732-0.754 | 0.644-0.681 | 0.749-0.767 | 0.702-0.735 | 0.678-0.724 | 0.713-0.750 |
| Case3 | Ave (SD) | 0.054 (0.012) | 0.068 (0.022) | 0.071 (0.027) | 0.086 (0.029) | 0.092 (0.026) | 0.084 (0.034) |
|  | 95%CI | 0.047-0.062 | 0.055-0.082 | 0.054-0.087 | 0.069-0.104 | 0.076-0.108 | 0.063-0.106 |
| Case4 | Ave (SD) | 0.424 (0.045) | 0.484 (0.043) | 0.468 (0.074) | 0.491 (0.032) | 0.526 (0.047) | 0.458 (0.056) |
|  | 95%CI | 0.396-0.452 | 0.458-0.511 | 0.422-0.514 | 0.471-0.511 | 0.498-0.555 | 0.423-0.492 |
| Case5 | Ave (SD) | 0.968 (0.035) | 0.977 (0.013) | 0.971 (0.026) | 0.413 (0.145) | 0.802 (0.127) | 0.994 (0.006) |
|  | 95%CI | 0.946-0.990 | 0.969-0.985 | 0.955-0.987 | 0.323-0.503 | 0.723-0.880 | 0.990-0.998 |
| Case6 | Ave (SD) | 0.536 (0.144) | 0.270 (0.046) | 0.346 (0.107) | 0.217 (0.052) | 0.250 (0.103) | 0.655 (0.117) |
|  | 95%CI | 0.447-0.626 | 0.241-0.298 | 0.280-0.413 | 0.185-0.250 | 0.186-0.314 | 0.582-0.727 |
| Ave: average, SD: standard deviation, 95% CI: 95% confidence interval, AUC: Area under the ROC curve | | | | | | | |
